# Supplementary material for: Cancer Predisposition Genes in Cancer-Free Families
Source: PubMed Central journal article supplement (PMC7600438; doi:10.3390/cancers12102770), 2020-09-27

# Supplementary Materials: Cancer Predisposition Genes in Cancer-Free Families

Guoqiao Zheng, Calogerina Catalano, Obul Reddy Bandapalli, Nagarajan Paramasivam, Subhayan Chattopadhyay, Matthias Schlesner, Rolf Sijmons, Akseli Hemminki, Dagmara Dymerska, Jan Lubinski, Kari Hemminki and Asta Försti

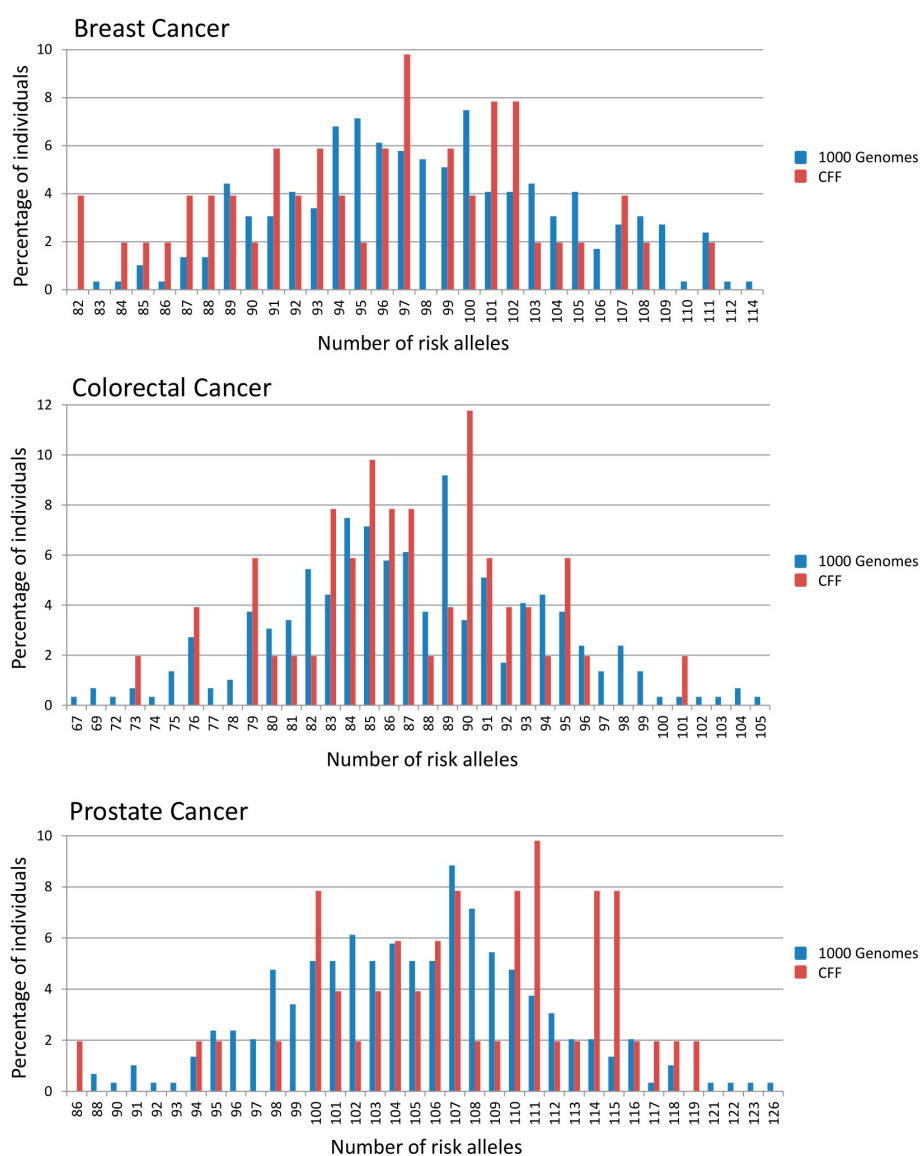

**Figure S1.** Distribution of the number of GWAS-identified risk alleles in the cancer free families (CFFs) and the 1000 Genomes population for the (a) breast cancer, (b) colorectal cancer, and (c) prostate cancer risk loci.

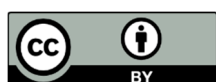

Supplement: cancers-12-02770-s001.pdf [file cancers-12-02770-s001.pdf]
